# Supplementary material for: Cryo-EM structure of trimeric Mycobacterium smegmatis succinate dehydrogenase with a membrane-anchor SdhF
Source: PubMed Central journal article supplement (PMC7447783; doi:10.1038/s41467-020-18011-9), 2020-08-25
Supplement: 41467_2020_18011_MOESM1_ESM.pdf [file 41467_2020_18011_MOESM1_ESM.pdf]

## Supplementary Information

Cryo-EM structure of trimeric *Mycobacterium smegmatis* succinate  
dehydrogenase with a membrane-anchor SdhF

Hongri Gong, Yan Gao et al.

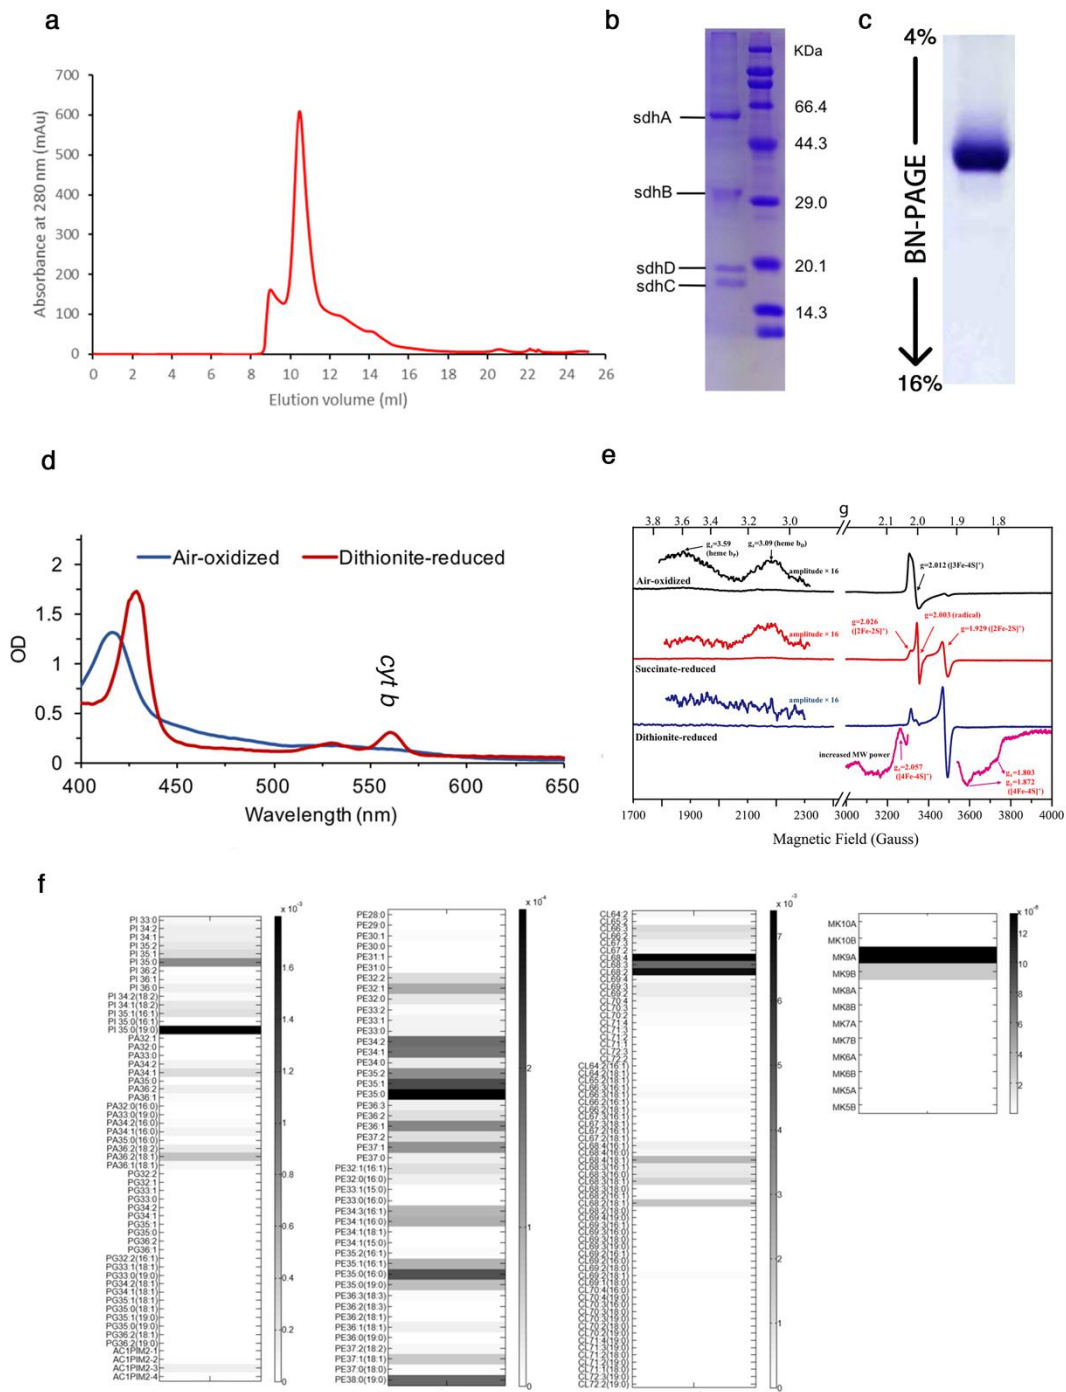

**Supplementary Fig. 1 Purification and component identification of the Sdh2 trimer from *Mycobacterium smegmatis*.** a, The elution profile of the Sdh2 trimer from size exclusion chromatography (SEC). Peak fractions were pooled and concentrated for preparation on the cryo-EM grids. b, SDS-PAGE of the pooled fraction from SEC in a. Each band is labelled with the corresponding subunit, which were then identified by mass spectrometry

(Table S1). **c**, Blue Native PAGE of the pooled fraction from SEC in **a**. The gel was stained with PMS/NTB. **d**, UV-visible spectra of the dithionite-reduced (black) and air-oxidized (red) forms of the Sdh2 trimer. The reduced wavelengths correspond to absorbance peaks of the cytochrome *b* (563 nm). **e**, EPR characterization of the purified complex. EPR spectra of the air-oxidized (black trace), succinate-reduced (red trace) and dithionite-reduced (blue and purple trace) complex. The EPR spectrum of the air-oxidized sample (black trace) showing characteristic peaks corresponding to the  $g_z$  of the two highly anisotropic low spin (HALS)-type heme groups and the oxidized  $[3\text{Fe-4S}]^+$  center; The EPR spectrum of the succinate-reduced sample (red trace) showing peaks arising from the reduced  $[2\text{Fe-2S}]^+$  cluster with an additional peak centered at  $g=2.003$  attributable to a semiquinone (SQ) radical. Part of the amplitude of signal corresponding to heme  $b_P$  was lost upon reduction by succinate; Further reduction with dithionite (blue trace) resulted in complete loss of signal for both hemes due to complete reduction, along with the appearance of peaks from reduced  $[4\text{Fe-4S}]^+$  when the increased microwave (MW) power was increased to 15 mW (purple trace). Spectra were scaled correspondingly to highlight different metal centers. The central signals of dithionite-reduced samples under high MW power have been removed to highlight the outer  $g$ -values associated with the signal of  $[4\text{Fe-4S}]^+$ . **f**, The identification of lipids and variants of MKs in the protein sample.

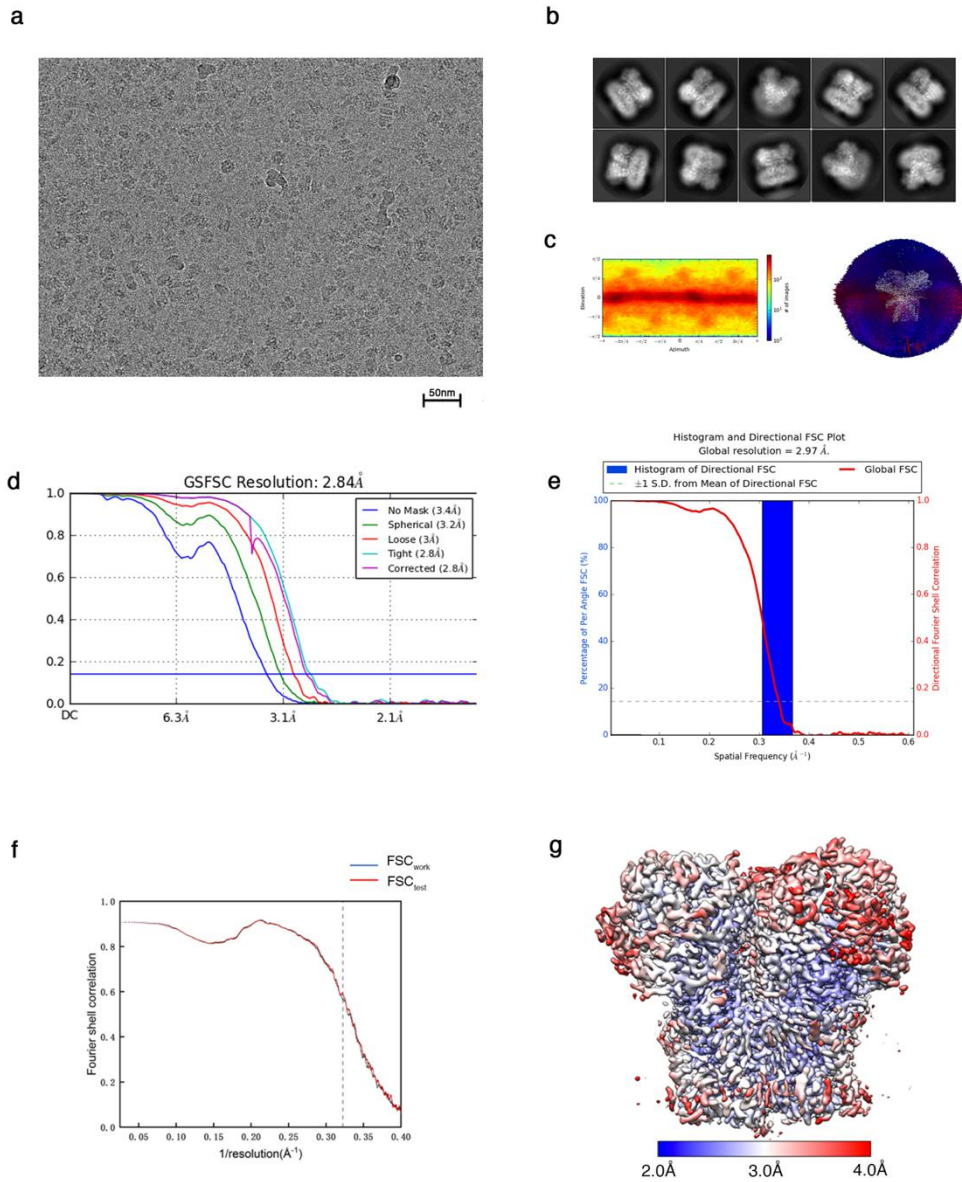

**Supplementary Fig. 2 Cryo-EM structure of the *M. smegmatis* Sdh2 complex.** **a**, Representative electron micrograph of the cryo-EM sample. **b**, Representative 2D classification averages calculated from selected particles. **c**, Viewing direction and Euler angle distributions of all particles used in the final 3D reconstruction. **d**, FSC curves of 3D reconstructions. **e**, 3DFSC histogram of final map. **f**,  $FSC_{work}$  and  $FSC_{test}$  calculations. **g**, Front view of the density map, which is colored according to the local resolution.

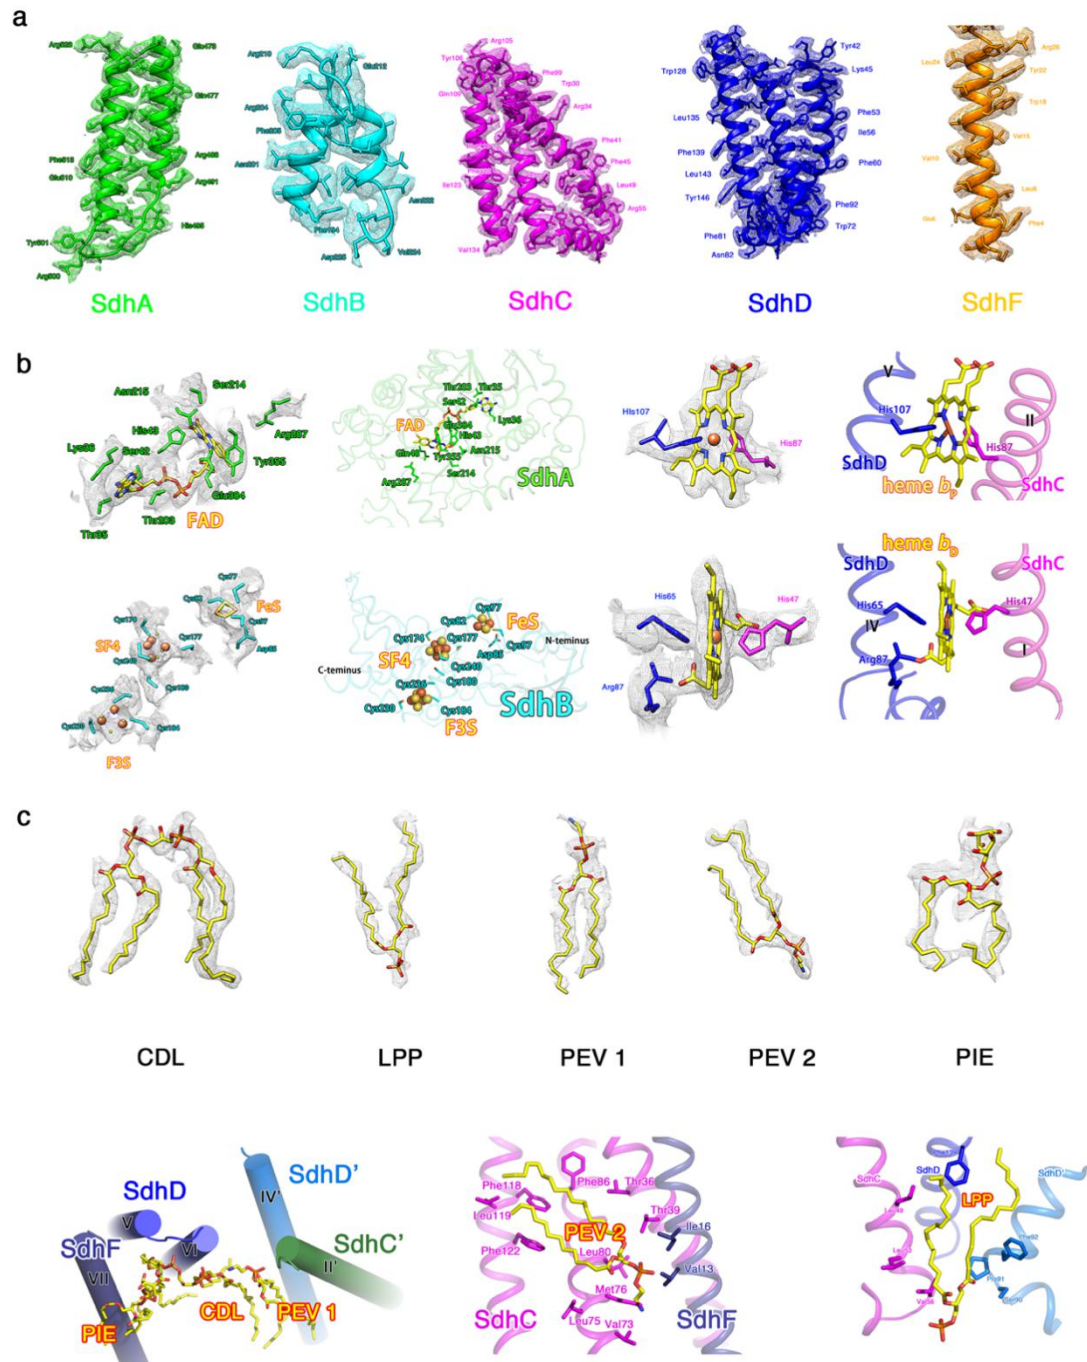

**Supplementary Fig. 3 Cryo-EM map quality assessment and ligand representation of Sdh2 protein.** Representative cryo-EM densities of (a) individual subunits, (b) prosthetic groups and (c) phospholipids of the Sdh2 trimer from *M. smegmatis*. Corresponding subunits or residues interacting with prosthetic groups and phospholipids are shown in stick or cartoon representation.

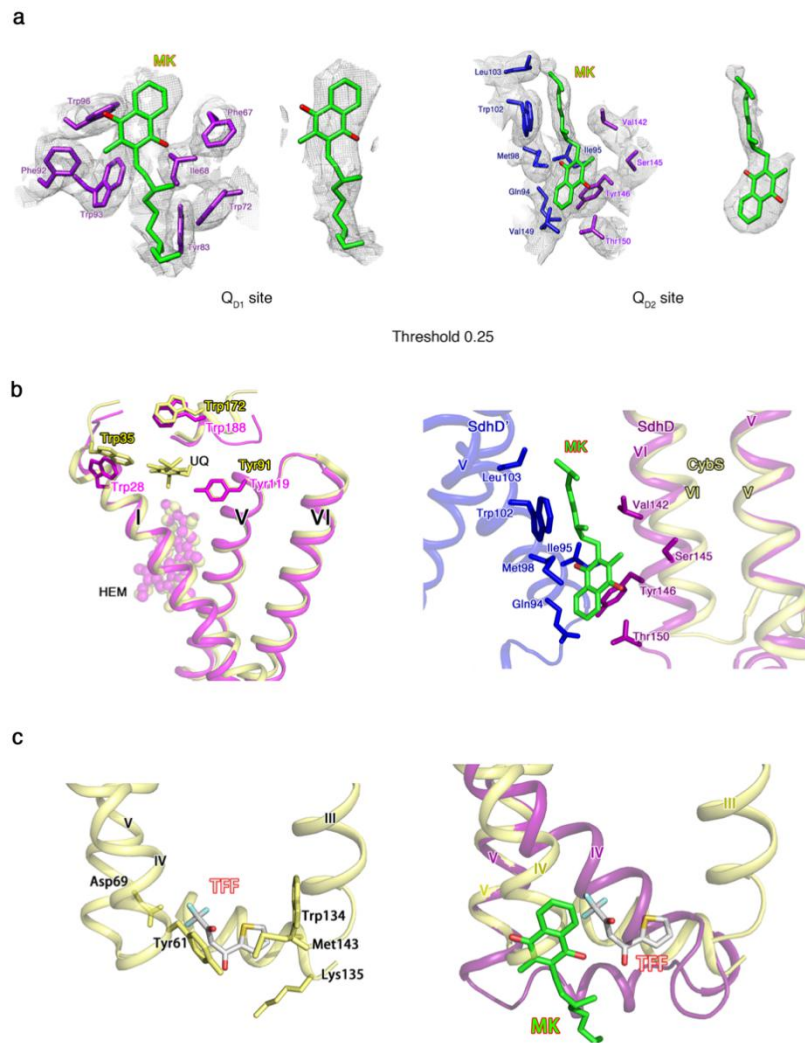

**Supplementary Fig. 4 Quinone sites in *M. smegmatis* Sdh2 and porcine SQR.** **a**, Representative cryo-EM densities of menaquinone/menaquinol molecules bound in *M. smegmatis* Sdh2. Individual densities for each MK is shown. **b**, Structural superposition between *M. smegmatis* Sdh2 (purple) and porcine SQR (yellow) with bound UQ1 (PDB: 1ZOY). Canonical Qp (left) and newly identified Q<sub>D2</sub> sites (right) are shown. For the Q<sub>D2</sub> site, the neighboring SdhD subunit of another monomer is colored in blue. **c**, (left) Q<sub>D1</sub> binding pocket of porcine SQR with bound TFF inhibitor (PDB: 1ZP0). (right) Structural superposition of Q<sub>D1</sub> site for *M. smegmatis* Sdh2 and porcine SQR.



|                         | 1 | 10 | 20 | 30 |   |   |   |   |   |   |   |   |   |   |   |   |   |   |   |   |   |   |   |   |   |   |   |   |   |   |   |   |
|-------------------------|---|----|----|----|---|---|---|---|---|---|---|---|---|---|---|---|---|---|---|---|---|---|---|---|---|---|---|---|---|---|---|---|
| <i>M. smegmatis</i>     | M | V  | L  | F  | F | E | I | L | L | V | A | A | V | L | V | I | T | W | F | A | V | Y | A | L | Y | R | L | V | T | D | E | S |
| <i>M. tuberculosis</i>  | M | V  | L  | F  | F | E | I | M | L | V | L | A | T | V | V | I | S | W | F | A | L | Y | T | L | Y | R | L | V | T | D | E | S |
| <i>M. phlei</i>         | M | V  | L  | F  | F | E | I | L | L | V | A | A | V | V | V | I | T | W | F | A | L | Y | A | L | Y | R | L | I | T | D | E | S |
| <i>M. tokaiense</i>     | M | V  | L  | F  | F | E | I | L | L | V | A | A | V | V | V | I | T | W | F | A | L | Y | A | L | Y | R | L | I | T | D | E | S |
| <i>M. houstonense</i>   | M | V  | L  | F  | F | E | I | L | L | V | A | A | V | V | V | I | T | W | F | A | L | Y | T | L | Y | R | L | V | T | D | E | S |
| <i>M. hassiacum</i>     | M | V  | L  | F  | F | E | I | L | L | V | A | A | V | V | V | I | T | W | F | A | L | Y | T | L | Y | R | L | I | T | D | E | S |
| <i>M. phocaicum</i>     | M | V  | L  | F  | F | E | I | L | L | V | A | A | S | L | A | I | T | W | F | A | L | Y | A | L | Y | R | L | I | T | D | E | S |
| <i>M. aquaticum</i>     | M | V  | L  | F  | F | E | I | M | L | V | A | A | V | V | V | I | T | W | F | A | L | Y | T | L | Y | R | L | V | T | D | E | S |
| <i>M. kyorinense</i>    | M | V  | L  | F  | F | E | I | M | L | V | T | A | V | V | V | I | T | W | F | A | L | Y | A | L | Y | R | L | I | T | D | E | S |
| <i>M. rhodesiae</i>     | M | V  | L  | F  | F | E | I | L | L | V | A | T | V | V | L | I | T | W | F | A | L | Y | A | L | Y | R | L | V | T | D | E | S |
| <i>M. aubagnense</i>    | M | V  | L  | F  | F | E | I | M | L | V | A | A | S | L | A | I | T | W | F | A | L | Y | A | L | Y | R | L | I | T | D | E | S |
| <i>M. chitae</i>        | M | V  | L  | F  | F | E | I | M | L | V | A | A | V | V | V | I | T | W | F | A | I | Y | T | L | Y | R | L | I | T | D | E | S |
| <i>M. moriokaense</i>   | M | V  | L  | F  | Y | E | I | L | L | V | A | T | V | V | V | I | T | W | F | A | L | Y | A | L | Y | R | L | I | T | D | E | S |
| <i>M. thermoresisti</i> | M | V  | L  | F  | F | E | I | L | L | V | A | C | V | V | L | V | T | W | F | A | L | Y | A | L | Y | R | L | I | T | D | E | S |
| <i>M. tusciae</i>       | M | V  | L  | L  | F | E | I | L | L | I | A | A | V | V | V | I | T | W | F | A | V | Y | T | I | Y | R | L | V | T | D | E | S |
| <i>M. lacus</i>         | M | V  | L  | F  | F | E | I | M | L | V | A | A | T | L | V | I | S | W | F | A | L | Y | V | L | Y | R | L | I | T | D | E | S |
| <i>M. celeriflavum</i>  | M | V  | L  | F  | F | E | I | L | L | V | A | A | T | V | V | I | T | W | F | A | L | Y | A | V | Y | R | L | I | T | D | E | S |
| <i>M. fragae</i>        | M | V  | L  | F  | F | E | I | M | L | V | A | A | V | V | V | I | A | W | F | A | L | Y | A | L | Y | R | L | I | T | D | D | S |
| <i>M. neglectum</i>     | M | V  | L  | L  | F | E | I | L | L | I | A | A | V | V | V | I | T | W | F | A | V | Y | T | I | Y | R | L | I | T | D | E | S |
| <i>M. hodleri</i>       | M | V  | L  | F  | F | E | I | L | L | I | V | A | V | V | V | I | T | W | F | A | V | Y | A | V | Y | R | L | V | T | D | E | L |
| <i>M. diernhoferi</i>   | M | V  | L  | F  | F | E | F | L | L | V | A | A | V | V | V | I | T | W | F | A | L | Y | A | V | Y | R | L | V | T | D | E | G |
| <i>M. intracellular</i> | M | V  | L  | F  | F | E | I | M | L | V | V | A | V | V | V | I | S | W | F | A | L | Y | P | L | Y | R | L | I | T | D | E | S |
| <i>M. doricum</i>       | M | V  | L  | F  | Y | E | I | L | L | V | V | C | T | L | V | I | T | W | F | A | L | Y | A | L | Y | R | L | V | T | D | D | S |
| <i>M. koreensis</i>     | M | V  | L  | F  | F | E | I | L | L | V | S | A | T | L | V | I | T | W | F | A | L | Y | V | L | Y | R | Q | L | T | D | E | S |
| <i>M. confluentis</i>   | M | V  | L  | F  | F | E | F | M | L | V | A | A | A | A | V | I | T | W | F | A | L | Y | A | L | Y | R | L | I | S | D | E | S |
| <i>M. litorale</i>      | M | V  | L  | F  | Y | E | I | L | L | V | V | C | T | L | V | I | T | W | F | A | L | Y | A | V | Y | R | L | I | T | D | E | S |
| <i>M. uberis</i>        | M | V  | L  | F  | F | E | I | M | L | I | V | A | V | V | V | I | S | W | F | A | L | Y | T | L | Y | R | L | I | T | D | E | S |
| <i>M. trivialis</i>     | M | V  | L  | F  | F | E | I | M | L | V | A | A | T | A | A | I | T | W | F | A | L | Y | V | L | Y | R | Q | I | T | D | E | S |
| <i>M. duvalii</i>       | M | V  | L  | F  | F | E | I | L | L | V | V | A | V | V | V | I | T | W | F | A | L | Y | A | L | Y | R | L | V | T | D | E | S |

**Supplementary Fig. 5 Sequence alignments of SdhF subunits.** In order to evaluate the conservation of the subunit SdhF in the *phylum Actinobacteria*, homologous sequences were retrieved through the NCBI BLAST. The highly homologous sequences of representative species of mycobacteria were obtained.

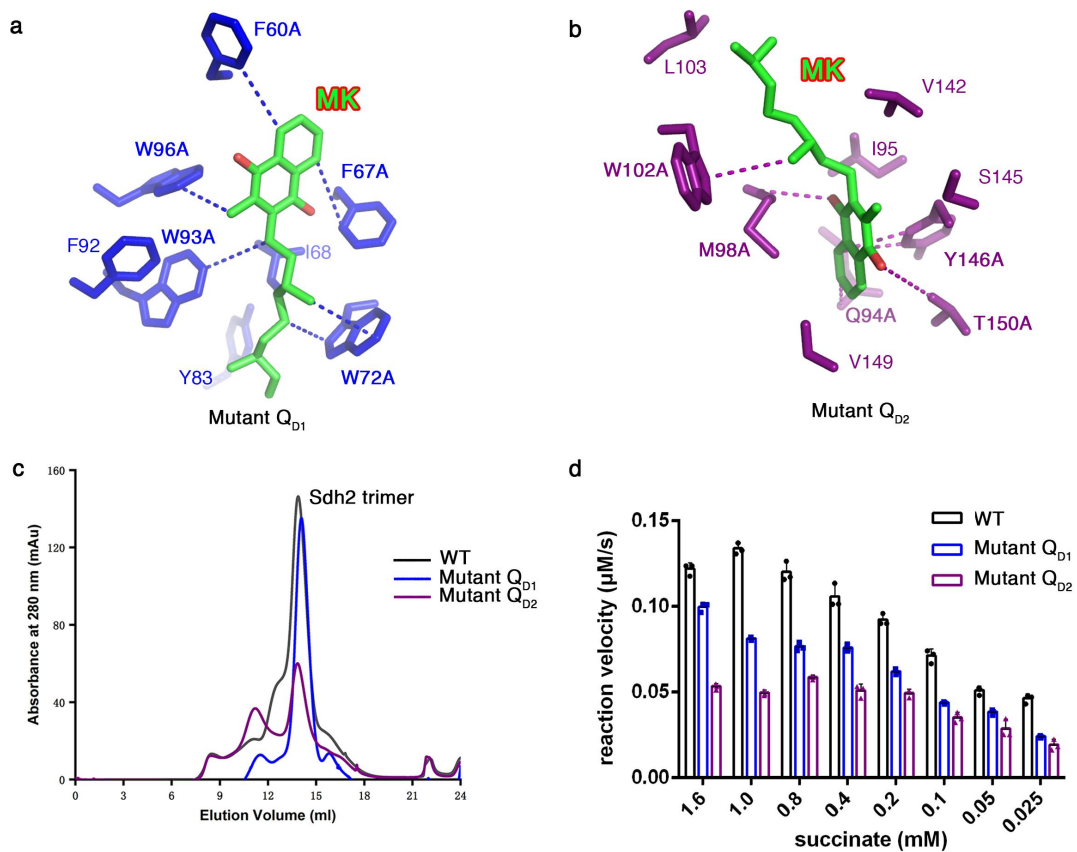

**Supplementary Fig. 6 Characterization of activities of the wild-type and mutant Sdh2 complex.** Residues potentially interacting with menaquinone in (a)  $Q_{D1}$  site and (b)  $Q_{D2}$  site are labeled. The residues, Phe60, Phe67, Trp72, Trp93, and Trp96 from  $Q_{D1}$  site and Qln94, Met98, Trp102, Tyr146, and Thr150 from  $Q_{D2}$  site were mutated to alanine, respectively. (c) Gel filtration chromatography for wt and two mutants. (d) Enzymatic activity for the wild-type, mutated  $Q_{D1}$  and mutated  $Q_{D2}$  of Sdh2 complexes. Mean values resulting from technical triplicates and error bars using standard deviation are shown.



**Supplementary Table 1. Identification of the Sdh2 complex subunits by peptide mass fingerprint spectroscopy**

| <b>Subunits</b>          |                     |                                           | <b>Mass Spectroscopy</b> |                 |
|--------------------------|---------------------|-------------------------------------------|--------------------------|-----------------|
| <b>Protein accession</b> | <b>Protein Name</b> | <b>Theoretical Molecular Weight (kDa)</b> | <b>Peptides</b>          | <b>Coverage</b> |
| WP_011727811.1           | SdhA                | 64.4                                      | 45                       | 81              |
| WP_003893076.1           | SdhB                | 29.2                                      | 26                       | 76              |
| WP_011727812.1           | SdhC                | 15.6                                      | 16                       | 83              |
| WP_003893078.1           | SdhD                | 17.9                                      | 15                       | 90              |
| WP_011730792.1           | SdhF                | 3.7                                       | 1                        | 100             |

**Supplementary Table 2. Statistics for data collection, image processing  
and model building**

| <i>M. smegmatis</i> Sdh2 complex                    |              |
|-----------------------------------------------------|--------------|
| <b>PDB entry</b>                                    | 6LUM         |
| <b>EMDB entry</b>                                   | EMD-0981     |
| <b>Data collection and processing</b>               |              |
| Magnification                                       | 29,000       |
| Voltage (keV)                                       | 300          |
| Electron exposure (e <sup>-</sup> /Å <sup>2</sup> ) | 50.00        |
| Defocus range (μm)                                  | -1.2 to -2.2 |
| Pixel size (Å)                                      | 0.82         |
| Symmetry imposed                                    | C1           |
| Initial particle images (no.)                       | 1,973,698    |
| Final particle images (no.)                         | 461,385      |
| Map global resolution (Å)                           | 2.84         |
| Global resolution FSC threshold                     | 0.143        |
| Map local resolution range (Å)                      | 2.0-8.0      |
| Local resolution FSC threshold                      | 0.5          |
| <b>Refinement</b>                                   |              |
| Model resolution (Å)                                | 2.8          |
| FSC threshold                                       | 0.143        |
| Model resolution range (Å)                          | to 2.8       |
| Map sharpening <i>B</i> factor (Å <sup>2</sup> )    | 93.5         |
| <b>Model composition</b>                            |              |
| Non-hydrogen atoms                                  | 26,191       |
| Protein residues                                    | 3,178        |
| Ligands                                             | 39           |
| <b><i>B</i> factors (Å<sup>2</sup>)</b>             |              |
| Protein                                             | 30.42        |
| Ligand                                              | 35.82        |
| <b>R.m.s. deviations</b>                            |              |
| Bond lengths (Å)                                    | 0.010        |
| Bond angles (°)                                     | 1.165        |
| <b>Validation</b>                                   |              |
| MolProbity score                                    | 2.09         |
| Clashscore                                          | 10.26        |
| Poor rotamers (%)                                   | 0.08         |
| <b>Ramachandran plot</b>                            |              |
| Outliers                                            | 0.13         |
| Allowed                                             | 10.18        |
| Favored                                             | 89.69        |
| EMRinger score                                      | 3.31         |
| <b>Model vs. Data</b>                               |              |
| CC(mask)                                            | 0.86         |
| CC(volume)                                          | 0.81         |
| Mean CC for ligands                                 | 0.80         |

**Supplementary Table 3. Summary of the model**

| <b>Subunit Name</b> | <b>Chain</b> | <b>Total residues/range built</b>                    | <b>% atomic model</b> | <b>Cofactors</b>             | <b>Resolution (Å)</b> |
|---------------------|--------------|------------------------------------------------------|-----------------------|------------------------------|-----------------------|
| <b>SdhA</b>         | A/J/P        | 2-305, 347-581/<br>2-300, 347-581/<br>2-305, 347-381 | 92.0                  | FAD                          | 2.5~6.0               |
| <b>SdhB</b>         | B/K/Q        | 23-260/14-261/23-260                                 | 92.5                  | 2Fe-2S,<br>3Fe-3S,<br>4Fe-4S | 2.0~4.0               |
| <b>SdhC</b>         | C/G/M        | 15-136/15-137/16-138                                 | 88.9                  | Heme b                       | 2.0~3.5               |
| <b>SdhD</b>         | D/H/N        | 11-156/37-156/41-156                                 | 81.6                  | Heme b                       | 2.0~3.5               |
| <b>SdhF</b>         | E/I/O        | 1-31                                                 | 96.9                  |                              | 2.5~3.5               |

**Supplementary Table 4. Primers used in molecular cloning**

|                      |                                                                 |
|----------------------|-----------------------------------------------------------------|
| SdhD-F               | 5'-gccaagacaattgcggatccgtgagcgcgccaggggcagg-3'                  |
| SdhD-R               | 5'-tggtgatgatggtgatggtgtgaaatattcgcgtcgaagg-3'                  |
| pVV16-F              | 5'-ggatccgcaattgtcttggc-3'                                      |
| pVV16-R              | 5'-caccatcaccatcatcacca-3'                                      |
| Mutant_QD1_60-F      | 5'-tg <b>gcc</b> ctggcgctcggccacc-3'                            |
| Mutant_QD1_60-R      | 5'-cag <b>ggc</b> caccagcgcgaatgcc-3'                           |
| Mutant_QD1_67_72-F   | 5'- <b>gcc</b> atcatgctgat <b>ggc</b> gaggacggcgtgtaccggat-3'   |
| Mutant_QD1_67_72-R   | 5'- <b>cgc</b> catcagcatgat <b>ggc</b> caggtggccgagcgcaccagg-3' |
| Mutant_QD1_93_96-F   | 5'-ttc <b>gcg</b> cagatc <b>gcg</b> gacatggcc-3'                |
| Mutant_QD1_93_96-R   | 5'-tc <b>cgc</b> gatct <b>gcg</b> gaacggcgagg-3'                |
| Mutant_QD2_94-F      | 5'- <b>gcg</b> atctgggacatggccctgctctgg-3'                      |
| Mutant_QD2_94-R      | 5'-gtccagat <b>cgcc</b> cagaacggcgaggc-3'                       |
| Mutant_QD2_98-F      | 5'- <b>gcg</b> gccctgctctggttgcaatgatc-3'                       |
| Mutant_QD2_98-R      | 5'-gagcaggg <b>cg</b> ctccagatcgccca-3'                         |
| Mutant_QD2_102-F     | 5'- <b>gcg</b> ttggcaatgatccacggcgccaac-3'                      |
| Mutant_QD2_102-R     | 5'-cattgcca <b>acgcg</b> gagcagggccgcgctc-3'                    |
| Mutant_QD2_146_150-F | 5'-gcagc <b>gcc</b> gtactggtc <b>gccc</b> ttgacgcgaata-3'       |
| Mutant_QD2_146_150-R | 5'-tcgaa <b>ggcg</b> accagtac <b>ggc</b> gctgccagcaccaac-3'     |
